# Supplementary material for: Identification of CFAP52 as a novel diagnostic target of male infertility with defects of sperm head-tail connection and flagella development
Source: eLife journal article supplement (doi:10.7554/elife.92769), 2023-11-23
Supplement: fig3-data1 [file Figure 3-source data 1.docx]

**Figure 3—source data 1.**Primers for Sanger sequencing and Minigene.

| **Variant** | **Sequence (5’→3’)** |
| --- | --- |
| c.203G>T | AAAAAAAAGAAAGAAAAAAGA |
| ATAGAAGGGAACACAGACACT |
| c.1128G>A | ATTATTTCACTTGGTTTTGCG |
| CACTCCTCGTTGTTCCTCTTC |
| RT-PCR for *Cfap52* | TCACAAGGGCAAAATCGAAGC |
| CTCATCTCGGCACCTAGAGAA |
| RT-PCR for *Gapdh* | AGGTCGGTGTGAACGGATTTG |
| TGTAGACCATGTAGTTGAGGTCA |
| RT-PCR between SD6 and SA2 in plasmid | TCTGAGTCACCTGGACAACC |
| ATCTCAGTGGTATTTGTGAGC |
