# Supplementary material for: Identification of CFAP52 as a novel diagnostic target of male infertility with defects of sperm head-tail connection and flagella development
Source: eLife journal article supplement (doi:10.7554/elife.92769), 2023-11-23
Supplement: fig4-data1 [file Figure 4-source data 1.docx]

**Figure 4—source data 1.** Primers for *Cfap52*-KO mouse genotyping.

| **Primer** | **Sequence (5’→3’)** | **Band size** |
| --- | --- | --- |
| F1 | CTCAACATGCAAGCAGGAATCTCTC | WT: 4210 bp  KO: 377 bp |
| R1 | CTGTGCATTGAGAGGACATGGAA |
| F2 | CCACCACCCAGATACTTACATGTCT | WT: 466 bp  KO: 0 bp |
| R2 | TTCAGTTGTTCAGCTGTCACTGGG |
