# Supplementary figures and images for: Identification of CFAP52 as a novel diagnostic target of male infertility with defects of sperm head-tail connection and flagella development
Source: eLife journal article supplement (doi:10.7554/elife.92769), 2023-11-23

Figure 4C


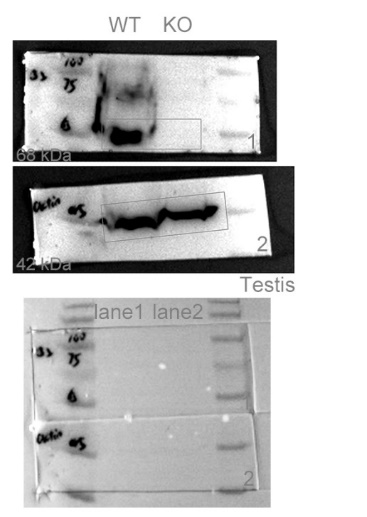

Supplement: fig4-data2 [file Figure 4C-labeled.docx]
